# Supplementary material for: A facile one-pot synthesis of Co2P nanoparticle-encapsulated doped carbon nanotubes as bifunctional electrocatalysts for high-performance rechargeable Zn–air batteries
Source: Royal Society of Chemistry journal article supplement (doi:10.1039/d0ce01716g), 2020-12-11
Supplement: d0ce01716g1.pdf [file d0ce01716g1.pdf]

## Supporting Information

**A facile one-pot synthesis of Co<sub>2</sub>P nanoparticle-encapsulated doped carbon nanotubes as bifunctional electrocatalysts for high-performance rechargeable Zn-air batteries**

Qi Shao, Tianjiao Li, Heng-guo Wang\*, Yanhui Li, Zhenjun Si and Qian Duan\*

School of Materials Science and Engineering, Changchun University of Science and Technology, Changchun 130022, China

## **Experimental Section**

### **Materials**

Phosphonitrilic chloride trimer ( $\text{Cl}_6\text{N}_3\text{P}_3$ ), melamine and cobalt acetylacetonate ( $\text{C}_{15}\text{H}_{21}\text{CoO}_6$ ) were purchased from Aladdin Chemical Reagent Co. Ltd. All materials were used without further purification. De-ionized water was obtained from an ultra-pure purification system.

### **Characterization**

The microstructures of the nanomaterials were observed by scanning electron microscopy (SEM Hitachi S-4800) and transmission electron microscope (TEM) recorded on a Tecnai G2 operating at 200 kV. The crystal phases were evaluated by X-ray diffraction (XRD) patterns recorded on a Rigaku-Dmax 2500 diffractometer with Cu Ka radiation. X-ray photoelectron spectroscopy (XPS) analysis conducted with Thermo SCIENTIFIC ESCALAB 250Xi instrument was used to analyze the composition of the nanomaterials. Raman spectra were collected with a Renishaw 2000 model confocal microscopy Raman spectrometer.

### **Electrochemical Measurements**

All electrochemical measurements were conducted on CS350 electrochemical workstation. The ORR/OER properties were taken on a three-electrode system in the corresponding electrolyte. The working electrode was RDE (5.0 mm in diameter), while the reference electrode was saturated calomel electrode (SCE) and the counter electrode was the graphite rod, respectively.

To prepare the working electrode, 1 mL ethanol containing catalyst (5 mg) and Nafion solution (50  $\mu\text{L}$ ) were ultrasonically dispersed to obtain the homogeneous ink. Afterward, 10  $\mu\text{L}$  ink catalyst was dropped onto RDE and then dried at room temperature. The recorded potentials versus SCE were converted to RHE scale based

on the Nernst equation ( $E_{\text{RHE}}=E_{\text{SCE}}+0.241+0.059\text{pH}$ ). As for ORR experiment, the CV tests were acquired in  $\text{N}_2$ - or  $\text{O}_2$ -saturated 0.1 M KOH solution with a scan rate of 50  $\text{mV s}^{-1}$ . LSV measurements were conducted at different speeds from 400 to 1600 rpm in an  $\text{O}_2$ -saturated solution with a sweep rate of 10  $\text{mV s}^{-1}$  without being  $iR$ -corrected. According to the LSV curves at the different potentials, the electron transfer number ( $n$ ) was calculated according to the Koutecky-Levich (K-L) equations.

As for OER experiments, the LSV curves were obtained at a scan rate of 5  $\text{mV s}^{-1}$  with being  $iR$ -corrected in the  $\text{O}_2$ -saturated 1 M KOH solution. Before all the electrochemical characterizations, the continuous sweep of corresponding voltage range is measured until the steady voltammogram curve is obtained.

The durability tests of the electrocatalysts for OER and ORR were both evaluated using chronoamperometric ( $i$ - $t$ ) measurement in corresponding solution at a rotation rate of 1600 rpm.

**Supplemental Figures**

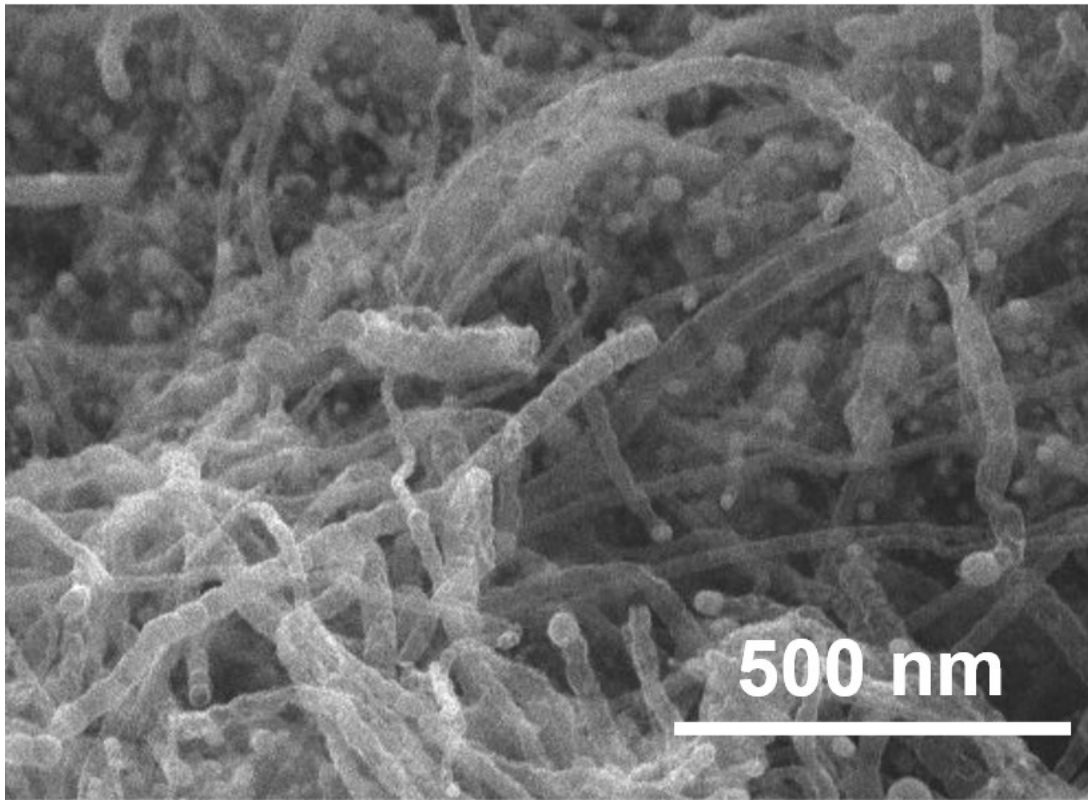

**Fig. S1** SEM image of  $\text{Co}_2\text{P}@$ NPCNTs-900.

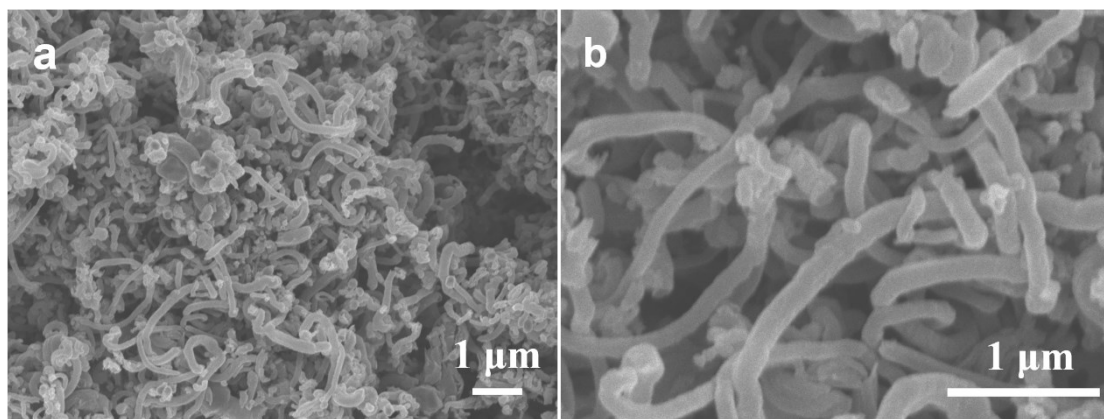

**Fig. S2** (a) Low and (b) high-resolution SEM images of Co@NCNTs-900.

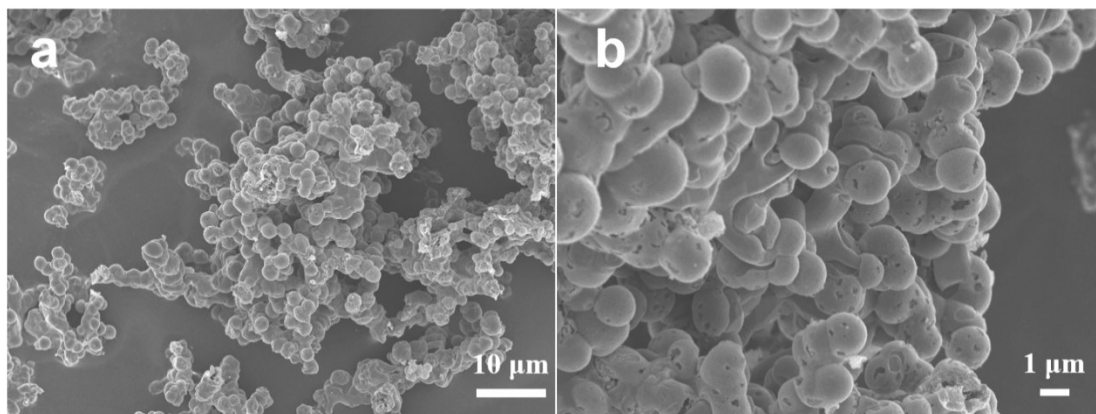

**Fig. S3** (a) Low and (b) high-resolution SEM images of  $\text{Co}_2\text{P}@NPC-900$ .

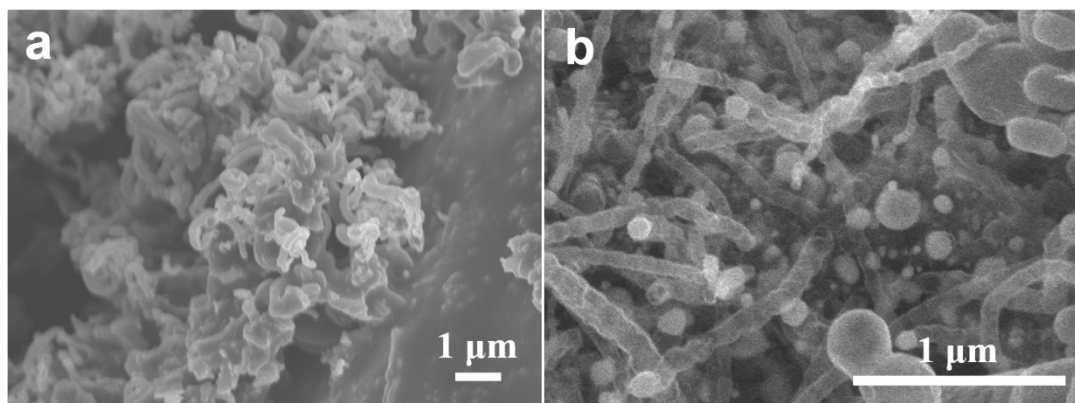

**Fig. S4** SEM images of (a)  $\text{Co}_2\text{P@NPCNTs-800}$  and (b)  $\text{Co}_2\text{P@NPCNTs-1000}$ .

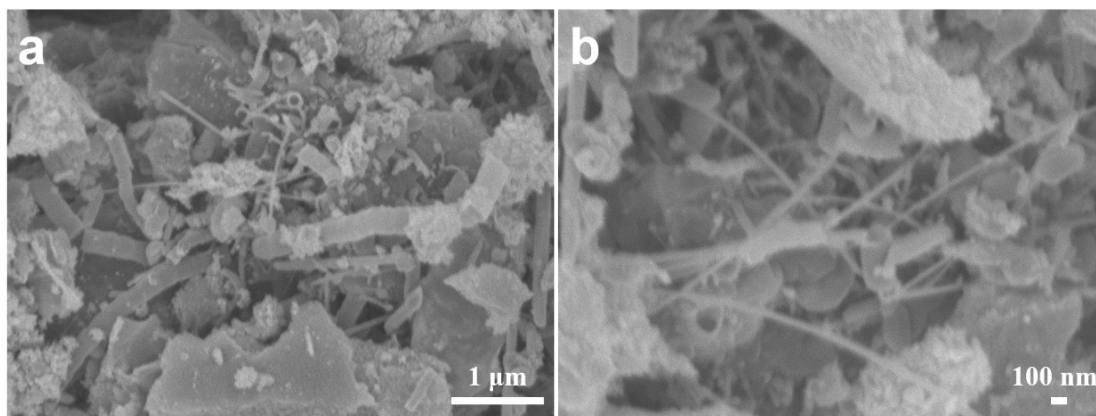

**Fig. S5** (a) Low and (b) high-resolution SEM images of  $\text{Co}_2\text{P}@$ NPCNTs-1.



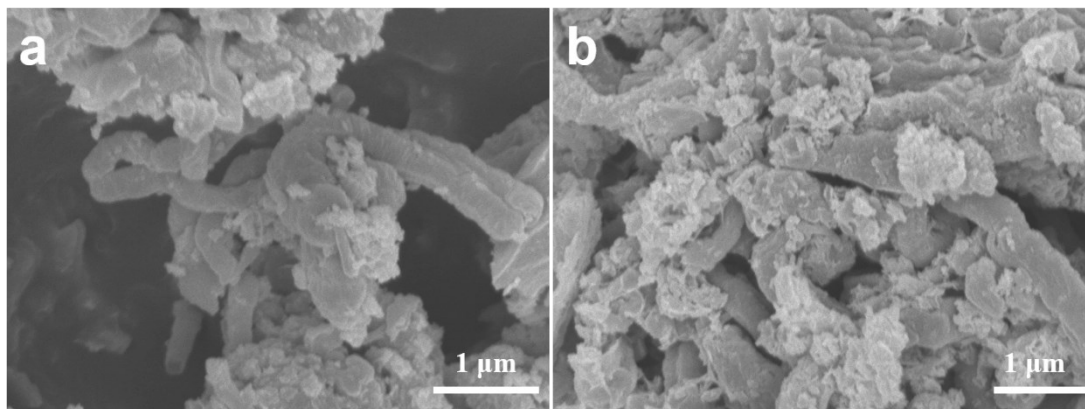

**Fig. S6** (a) Low and (b) high-resolution SEM images of  $\text{Co}_2\text{P}@\text{NPCNTs-3}$ .

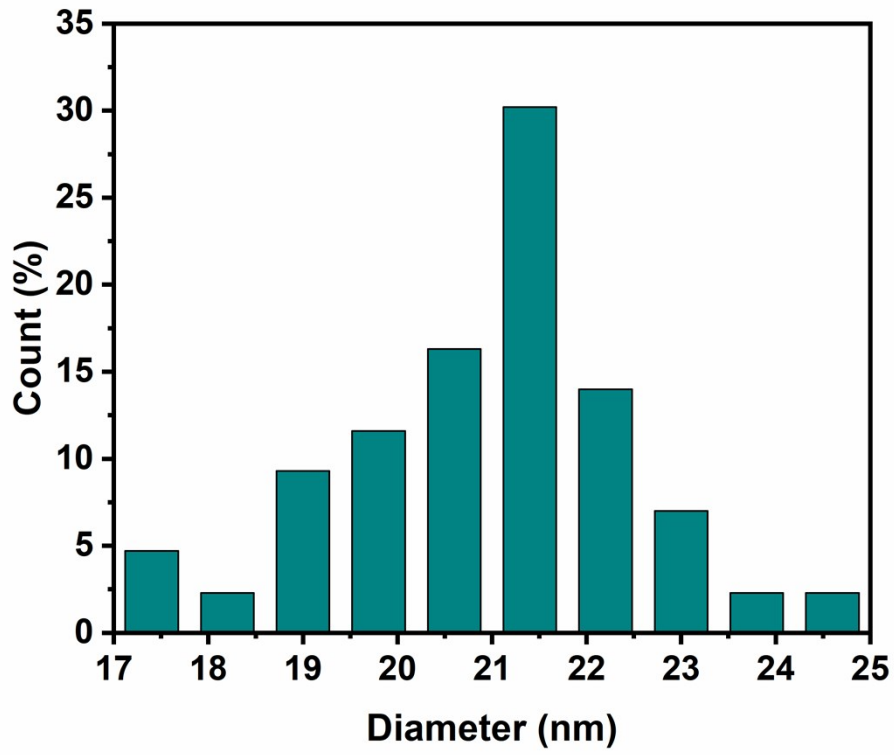

**Fig. S7** Particle size distribution of Co<sub>2</sub>P nanoparticles in Co<sub>2</sub>P@NPCNTs-900.

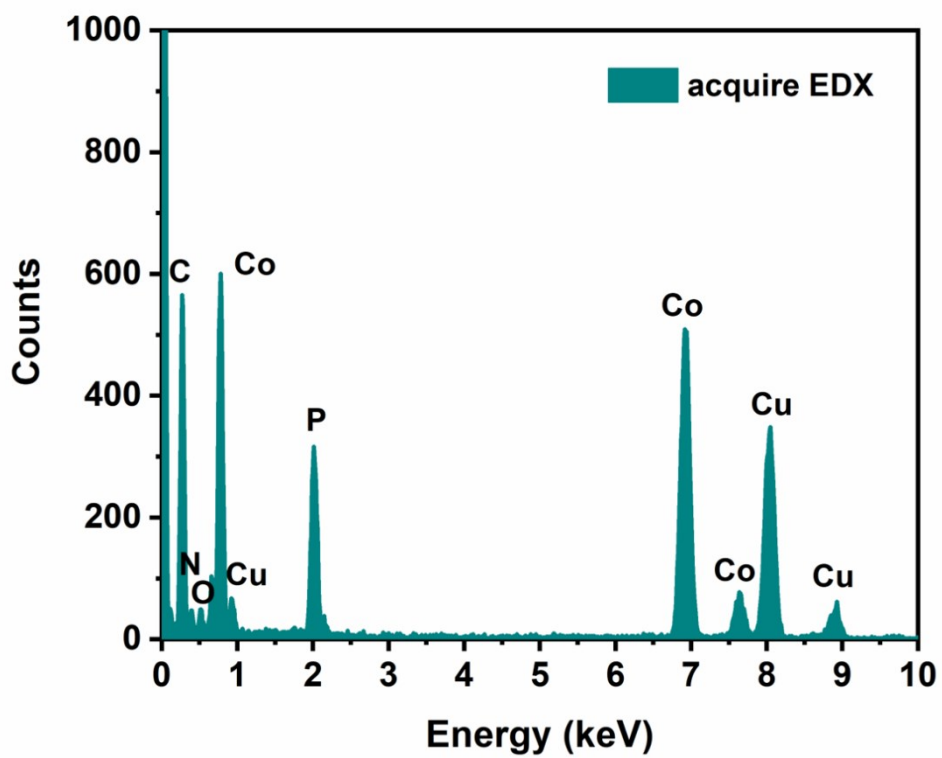

**Fig. S8** Energy-dispersive spectrometer (EDS) of Co<sub>2</sub>P@NPCNTs-900.

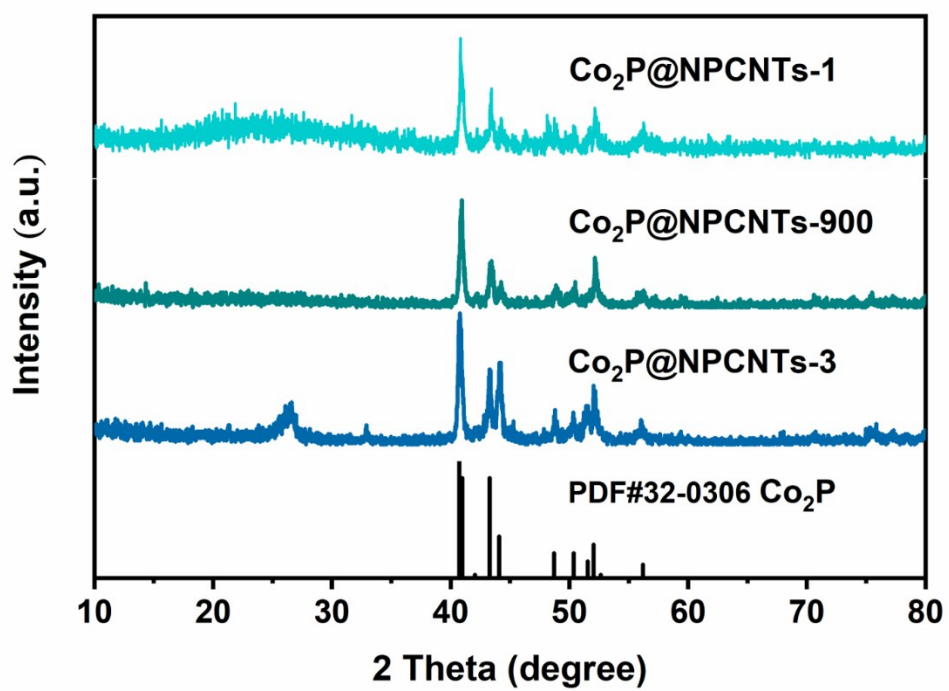

**Fig. S9** XRD patterns of  $\text{Co}_2\text{P@NPCNTs-1}$ ,  $\text{Co}_2\text{P@NPCNTs-900}$  and  $\text{Co}_2\text{P@NPCNTs-3}$ .

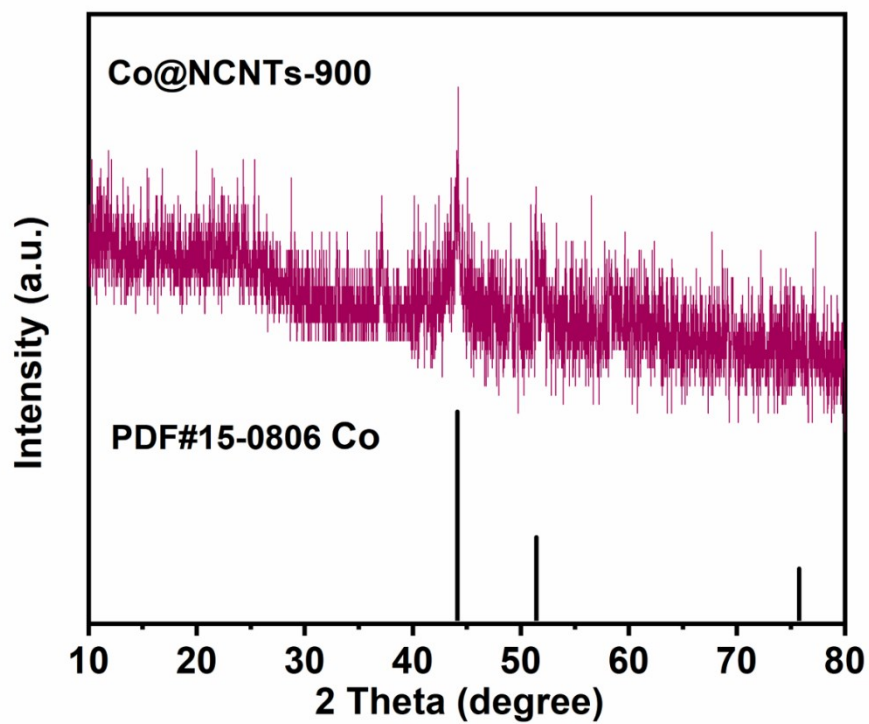

**Fig. S10** XRD patterns of Co@NCNTs-900.

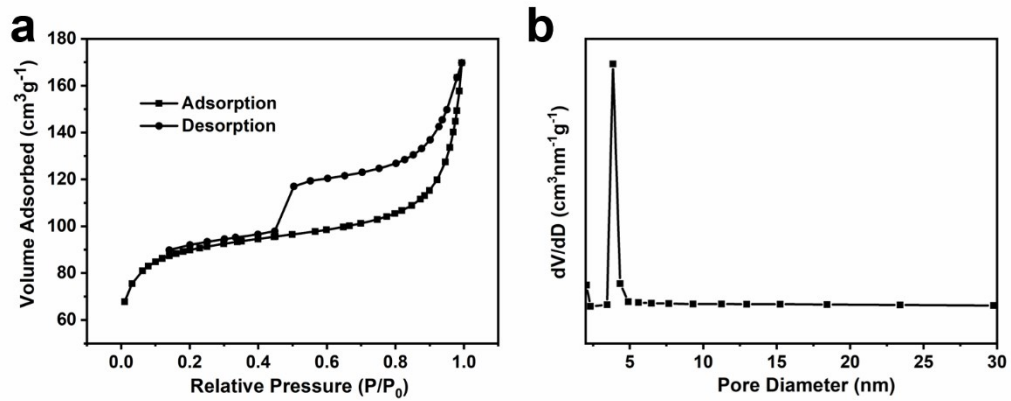

**Fig. S11** (a) N<sub>2</sub> adsorption-desorption isotherms and (a) pore size distribution of Co<sub>2</sub>P@NPCNTs-900.

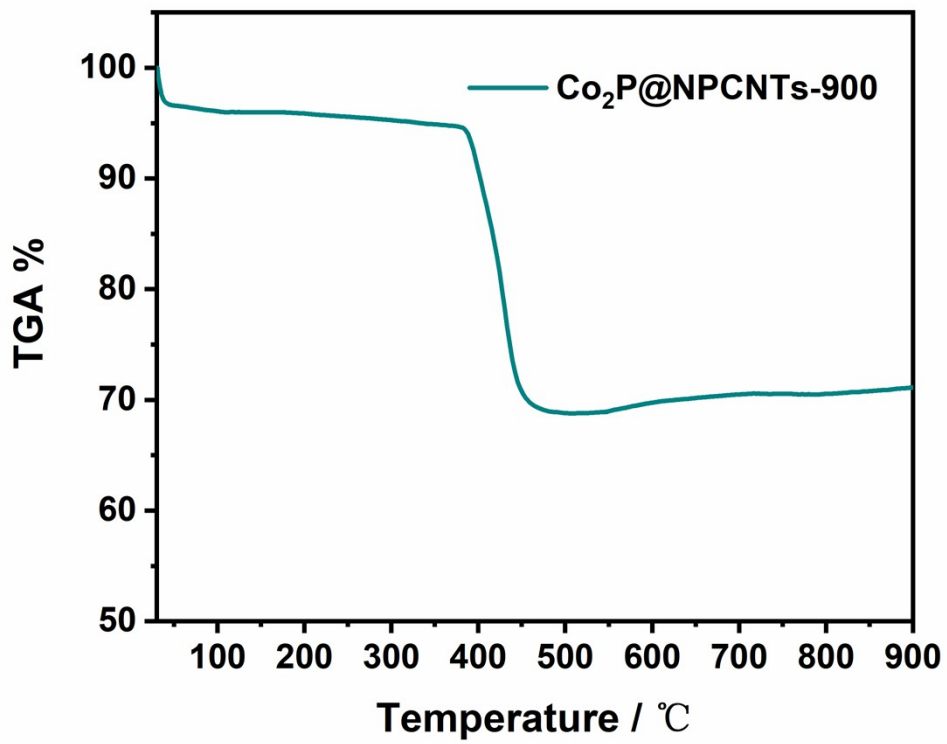

Fig. S12 TG curve of Co<sub>2</sub>P@NPCNTs-900.

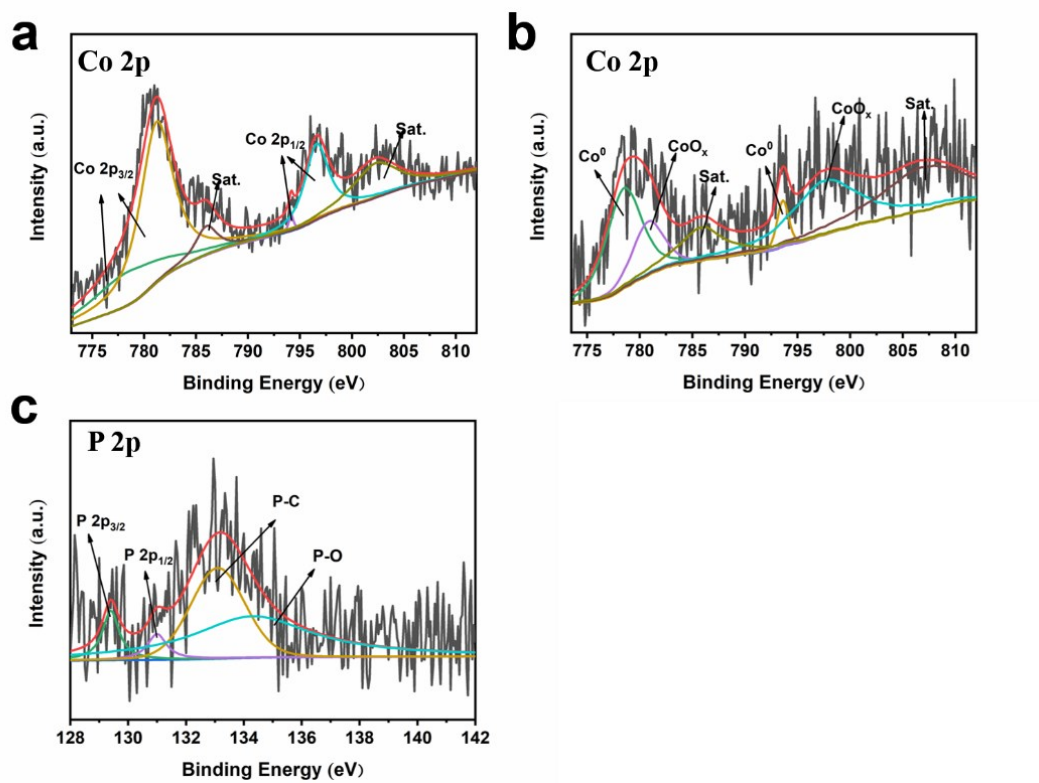

**Fig. S13** High-resolution Co 2p XPS spectrum of Co<sub>2</sub>P@NPC-900. (b) High-resolution Co 2p XPS spectrum of Co@NCNTs-900. (c) High-resolution P 2p XPS spectrum of Co<sub>2</sub>P@NPC-900.



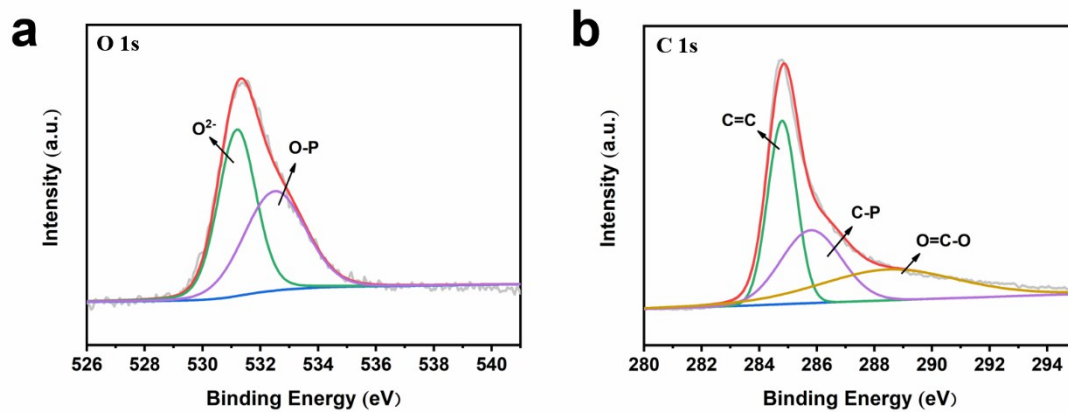

**Fig. S14** High-resolution XPS spectra of O 1s (a) and C 1s (b) of Co<sub>2</sub>P@NPCNTs-900.

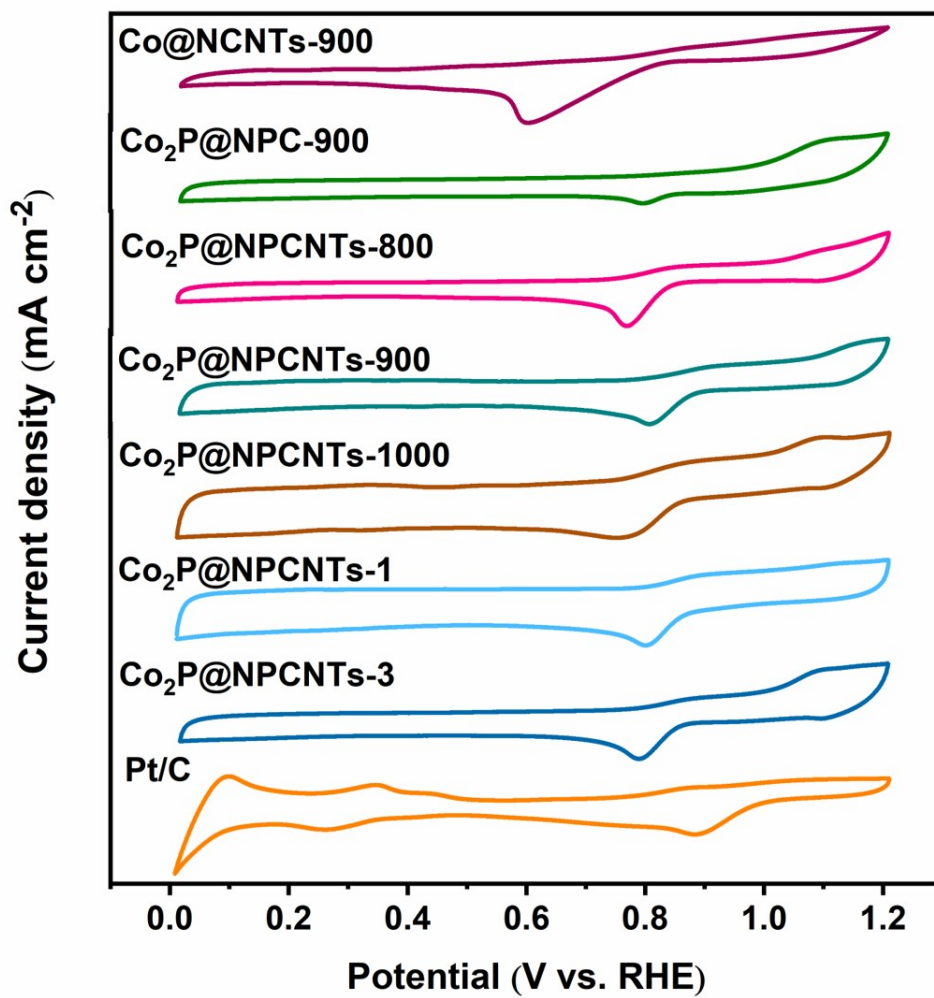

Fig. S15 CV curve of various samples in  $O_2$ -saturated 0.1 M KOH solution.

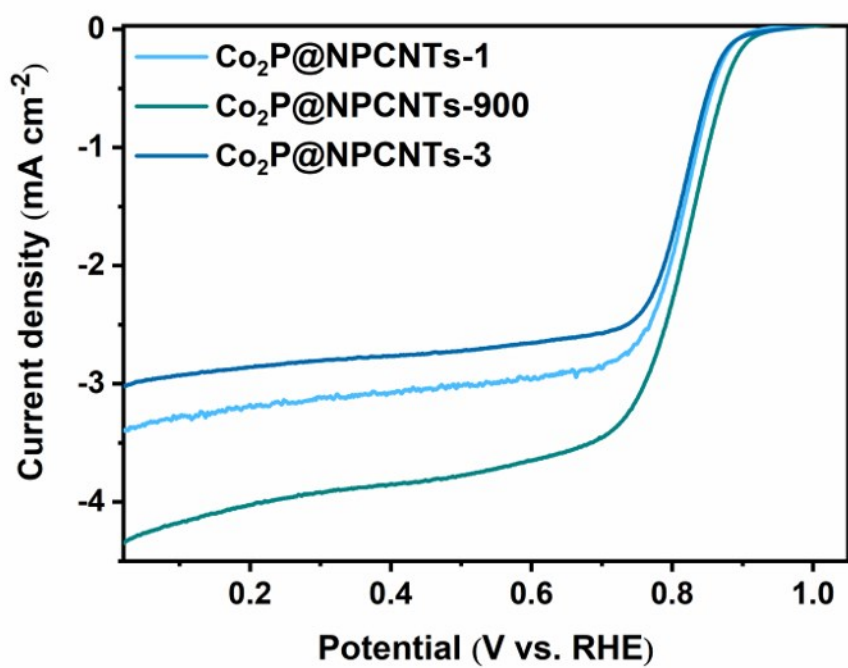

**Fig. S16** ORR LSV curves of Co<sub>2</sub>P@NPCNTs-1, Co<sub>2</sub>P@NPCNTs-900 and Co<sub>2</sub>P@NPCNTs-3.

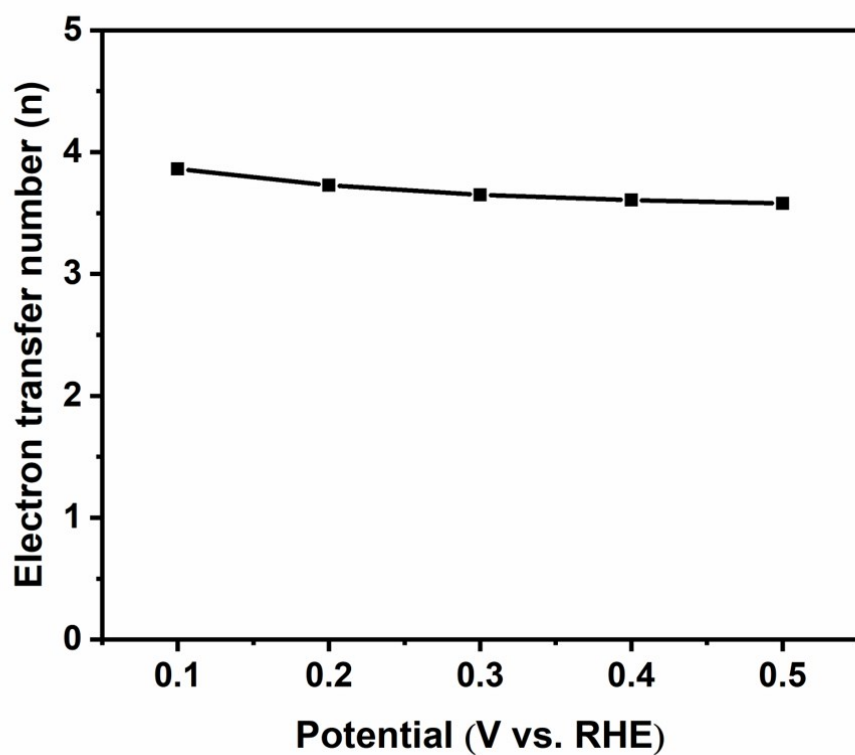

**Fig. S17** The electron transfer number obtained from RDE results of Co<sub>2</sub>P@NPCNTs-900.

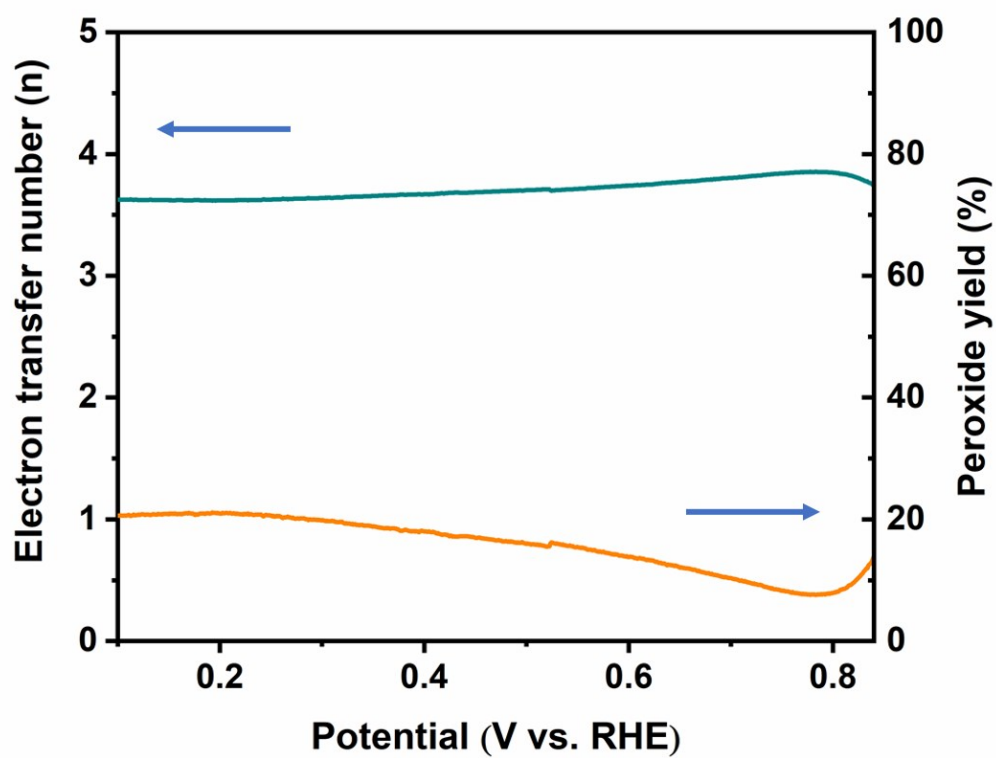

Fig. S18 Electron transfer number and H<sub>2</sub>O<sub>2</sub> yield based on RRDE measurements.

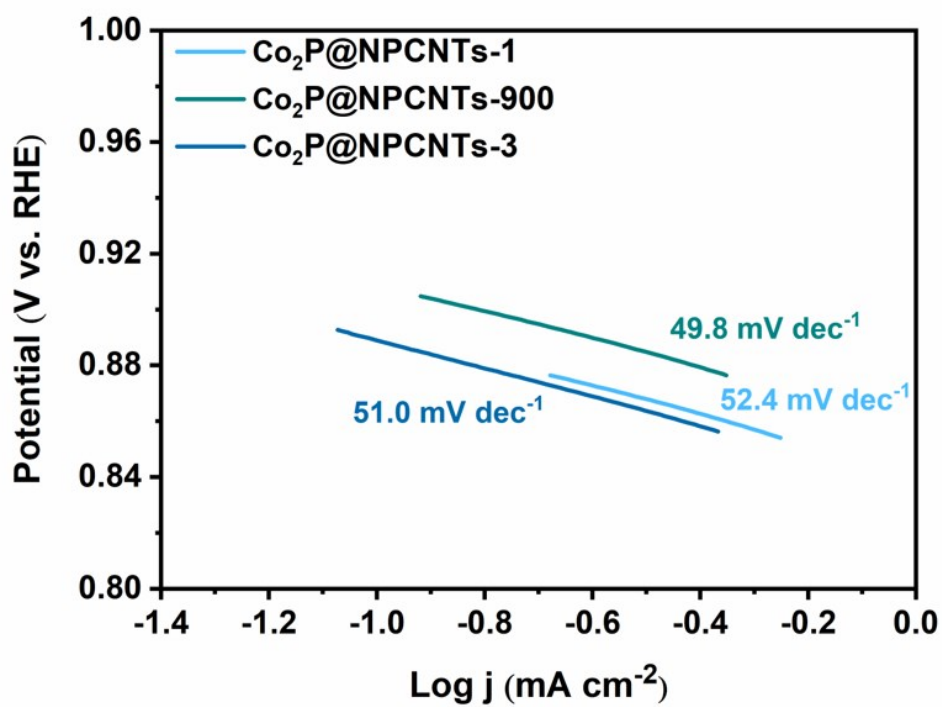

**Fig. S19** The ORR Tafel plots of Co<sub>2</sub>P@NPCNTs-1, Co<sub>2</sub>P@NPCNTs-900 and Co<sub>2</sub>P@NPCNTs-3.

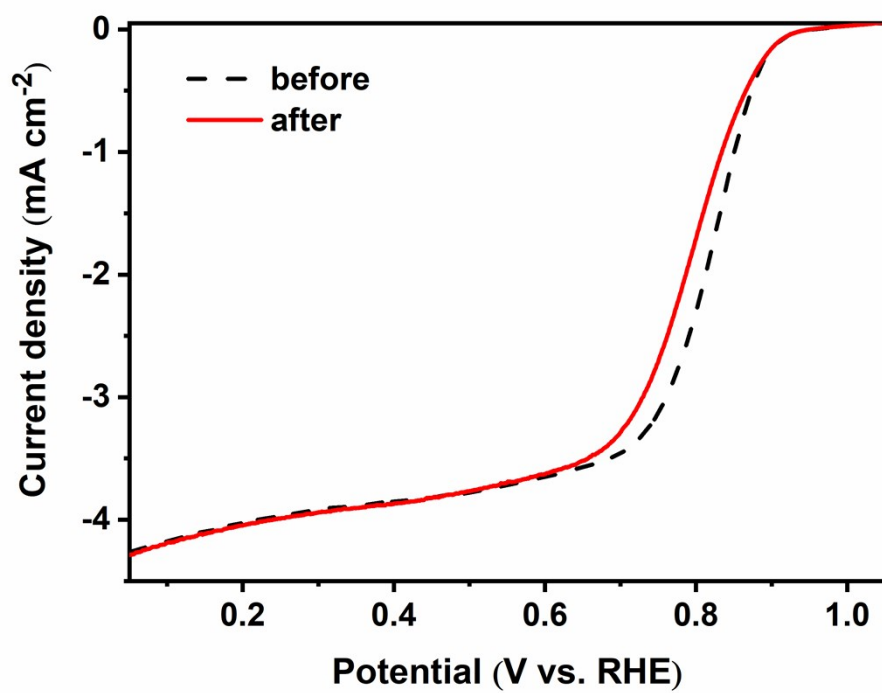

**Fig. S20** ORR LSV curves of Co<sub>2</sub>P@NPCNTs-900 before and after a continuous 5000-cycle CV scans.

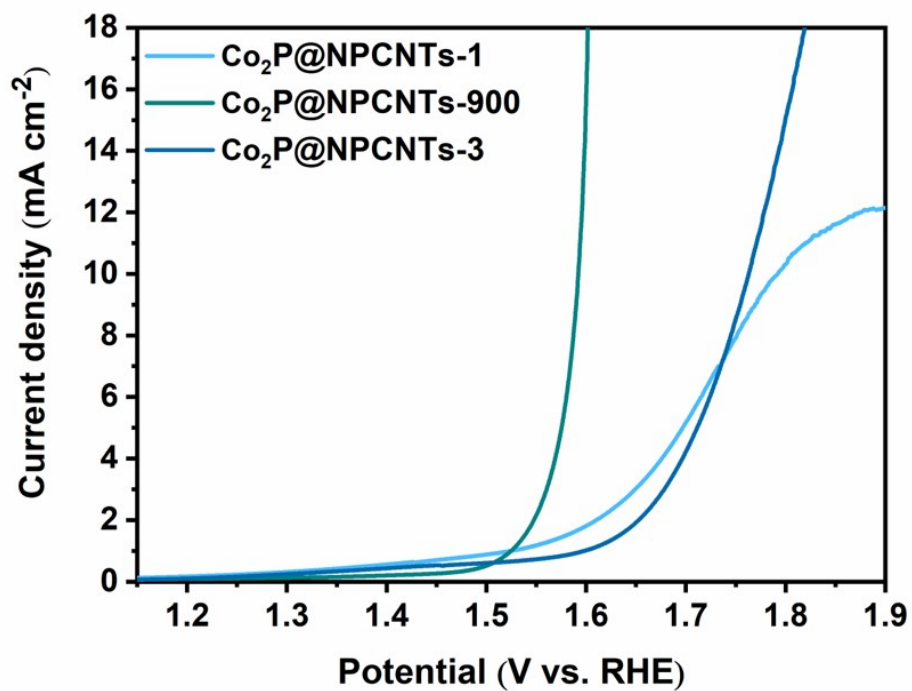

**Fig. S21** OER LSV curves of Co<sub>2</sub>P@NPCNTs-1, Co<sub>2</sub>P@NPCNTs-900 and Co<sub>2</sub>P@NPCNTs-3.



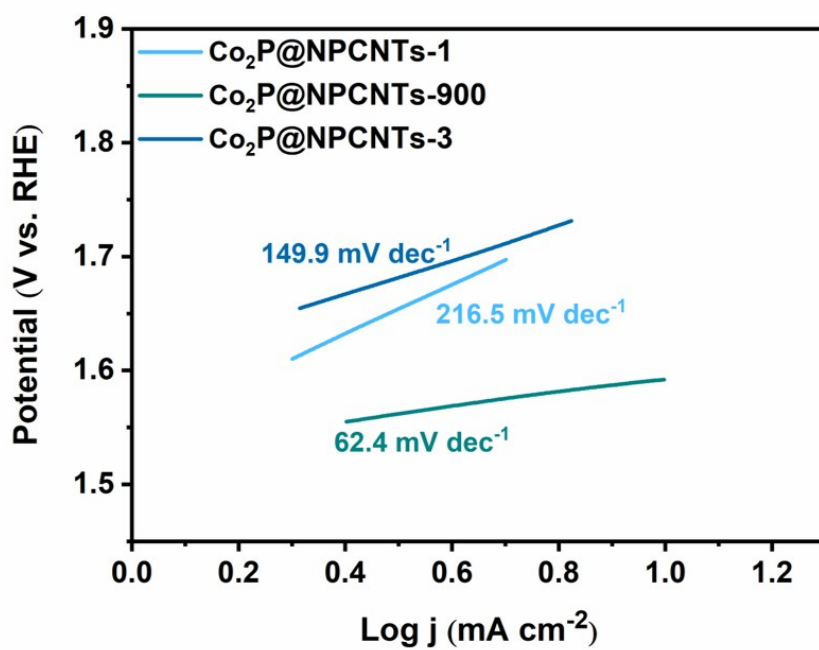

**Fig. S22** The OER Tafel plots of Co<sub>2</sub>P@NPCNTs-1, Co<sub>2</sub>P@NPCNTs-900 and Co<sub>2</sub>P@NPCNTs-3.

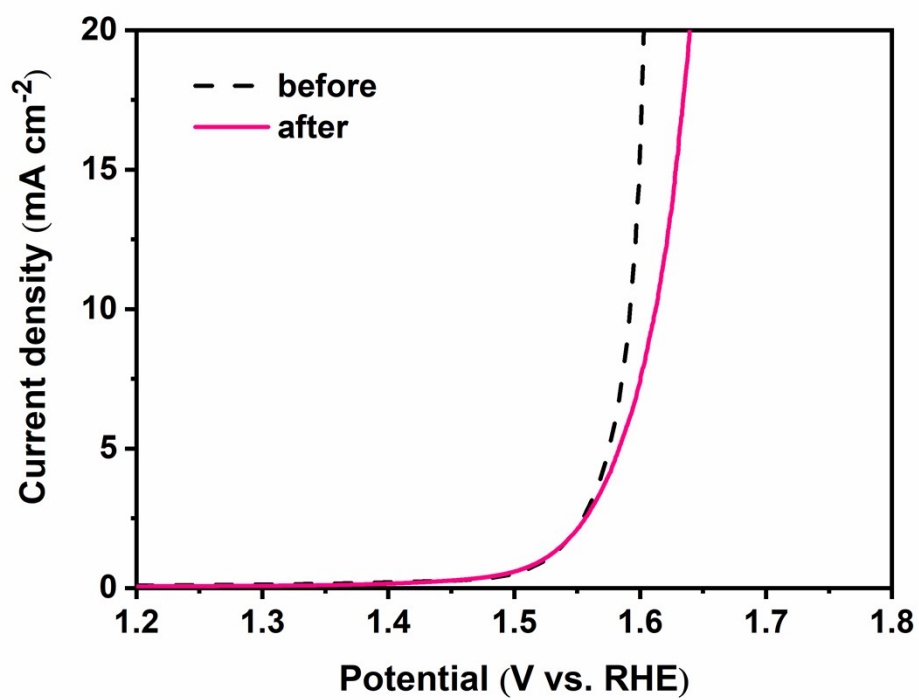

**Fig. S23** OER LSV curves of Co<sub>2</sub>P@NPCNTs-900 before and after a continuous 5000-cycle CV scans.

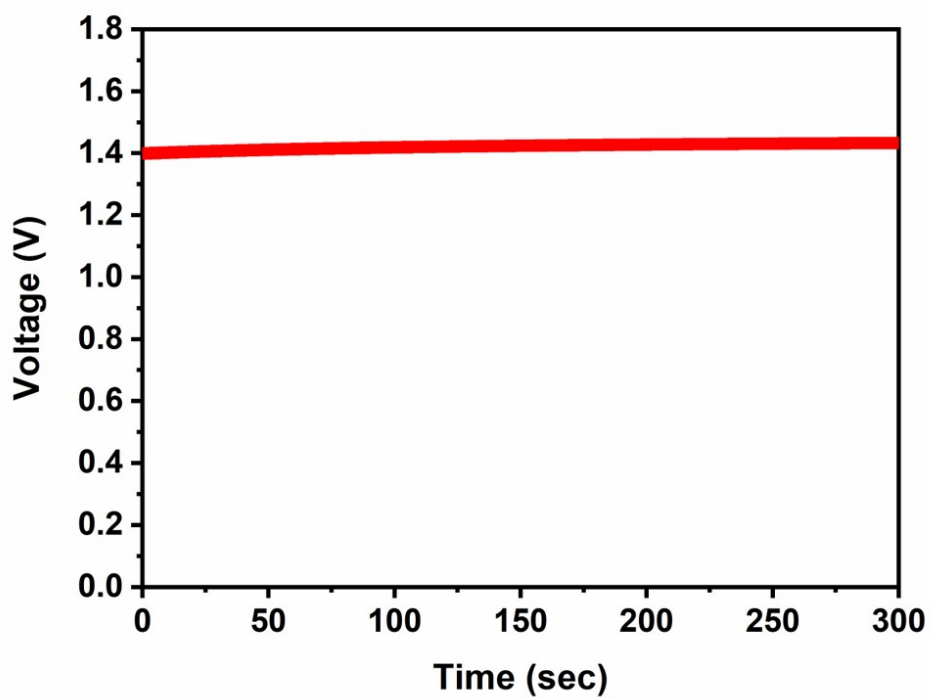

**Fig. S24** Open-circuit plots of assembled rechargeable ZABs of Pt/C-RuO<sub>2</sub> catalysts.

**Table S1** Elemental contents of C, O, N, P and Co in the Co<sub>2</sub>P@NPCNTs-900 determined by XPS analysis.

| Catalyst                     | C (at%) | P(at%) | N (at%) | O (at%) | Co (at%) |
|------------------------------|---------|--------|---------|---------|----------|
| Co <sub>2</sub> P@NPCNTs-900 | 77.99   | 2.63   | 10.40   | 7.25    | 1.72     |

**Table S2.** A survey of the catalytic performance of various electrocatalysts.

| Catalysts                            | ORR                |           | OER      | Reference                                        |
|--------------------------------------|--------------------|-----------|----------|--------------------------------------------------|
|                                      | $E_{\text{onset}}$ | $E_{1/2}$ | $E_{10}$ |                                                  |
|                                      | (V)                | (V)       | (V)      |                                                  |
| Co <sub>2</sub> P@NPCNTs             | 0.94               | 0.80      | 1.59     | <b>This work</b>                                 |
| CoP@SNC                              | --                 | --        | 1.58     | <b>Nanoscale</b><br>2018, 10, 14613              |
| N-GCNT/FeCo                          | 1.03               | 0.92      | 1.73     | <b>Adv. Energy Mater.</b><br>2017, 7, 1602420    |
| CoFe/N-GCT                           | 0.91               | 0.79      | 1.67     | <b>Angew. Chem. Int. Ed.</b><br>2018, 130, 16398 |
| Co-N-CNTs                            | 0.97               | 0.90      | 1.69     | <b>Adv. Funct. Mater.</b><br>2018, 28, 1705048   |
| Co <sub>2</sub> P/CoN-in-NCN<br>Ts   | 0.96               | 0.85      | 1.65     | <b>Adv. Funct. Mater.</b><br>2018, 28, 1805641   |
| Co <sub>3</sub> O <sub>4</sub> /NPGC | 0.97               | 0.84      | 1.68     | <b>Angew. Chem. Int. Ed.</b><br>2016, 55, 4977   |
| CoS <sub>x</sub> @PCN/rGO            | --                 | 0.78      | 1.57     | <b>Adv. Energy Mater.</b><br>2018, 8, 1701642    |
